# Supplementary material for: Reconstructing protein remodeled membranes in molecular detail from mesoscopic models
Source: Royal Society of Chemistry journal article supplement (doi:10.1039/c0cp02978e), 2011-01-01
Supplement: c0cp02978e.pdf [file c0cp02978e.pdf]

Supplementary Material (ESI) for *PCCP*  
This journal is © the Owner Societies 2011

**Supplemental data**  
**for**  
**Reconstructing protein remodeled membranes in molecular**  
**detail from mesoscopic models**

Edward Lyman, Haosheng Cui, and Gregory A. Voth<sup>†</sup>

*Department of Chemistry, Institute for Biophysical Dynamics, James Franck Institute,  
and Computation Institute, University of Chicago, 5735 S Ellis Ave., Chicago, IL 60637*

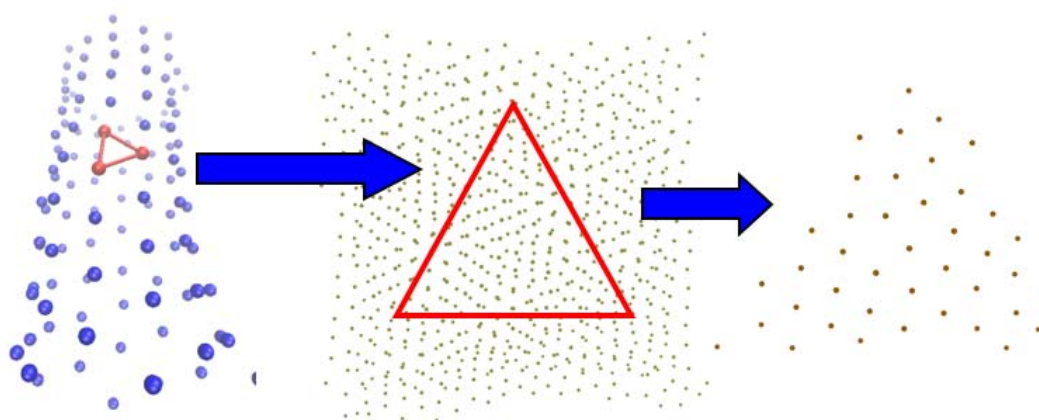

**Supplemental Figure 1.** Left Panel: Surface of a membrane tubule, as defined by a set of EM2 particle positions, indicated by blue spheres. A triangular patch of surface defined by three neighboring EM2 particles is shown in red. Middle Panel: The triangle defined by the EM2 particles is used to select a triangular piece of a pre-equilibrated membrane bilayer. The position of each Gay-Berne lipid is indicated by a brown point. Right Panel: The triangular patch of pre-equilibrated membrane.

Supplementary Material (ESI) for *PCCP*  
This journal is © the Owner Societies 2011

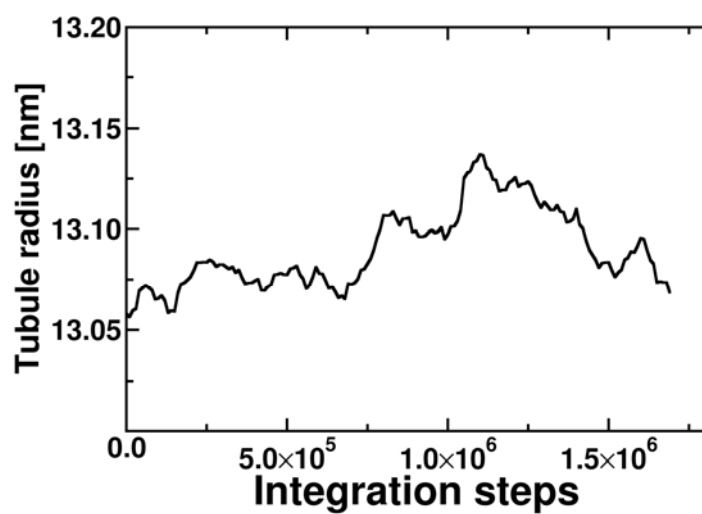

**Supplemental Figure 2.** Radius of the membrane tubule after initial heating minimization, measured from the midplane of the bilayer.

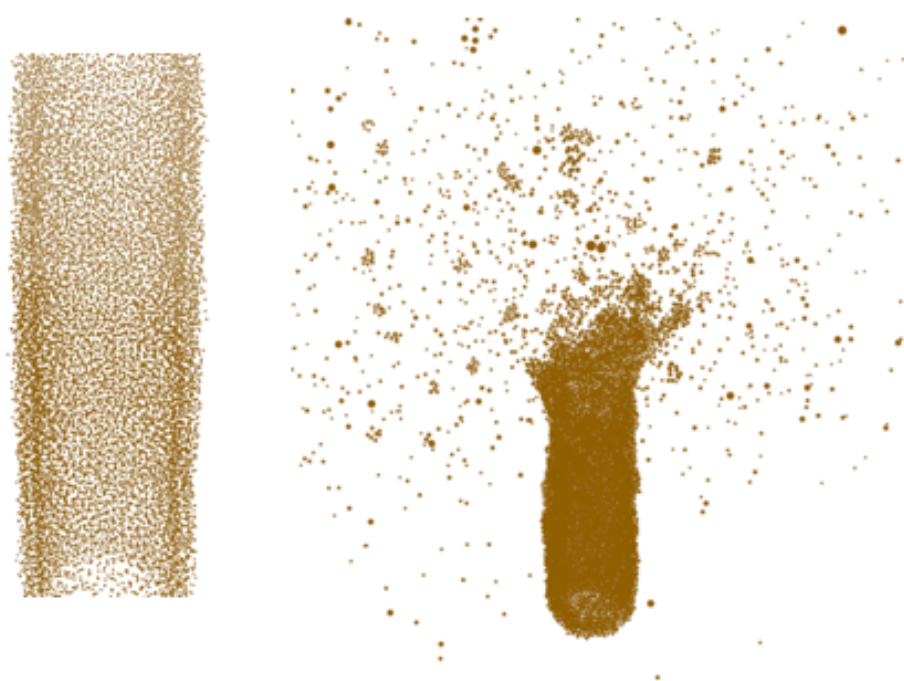

**Supplemental Figure 3.** Initial (left panel) and configuration after 2 million integration steps (Right panel) of a protein free membrane tubule.
